# Supplementary material
Source: Research Square preprint supplement (doi:10.21203/rs.3.rs-9690482/v1)
Supplement: Supplementary file 1 [file 4f02a51eeb463bf1e24c0ac2.docx]

**Supplementary Table. 3 Food group amounts per 100 g and per 100 kcal by dish category among frequently prepared Japanese home-style dishes**

|  | Per 100 g | | | | | | Per 100 kcal | | | | | |
| --- | --- | --- | --- | --- | --- | --- | --- | --- | --- | --- | --- | --- |
| Food group | Staple dish  (*n* = 20) | Main dish  (*n* = 79) | Side dish  (*n* = 152) | Mixed dish  (*n* = 113) | Mixed dish  with staple  (*n* = 98) | Unclassifiable dish  (*n* = 56) | Staple dish  (*n* = 20) | Main dish  (*n* = 79) | Side dish  (*n* = 152) | Mixed dish  (*n* = 113) | Mixed dish  with staple  (*n* = 98) | Unclassifiable dish  (*n* = 56) |
| Grains (g) | 64.2 ± 11.0 | 0.9 ± 2.5 | 0.1 ± 0.8 | 0.6 ± 1.8 | 40.3 ± 14.7 | 16.6 ± 22.3 | 40.1 ± 16.5 | 0.3 ± 0.9 | 0.1 ± 0.7 | 0.4 ± 1.1 | 28.6 ± 11.9 | 7.2 ± 9.6 |
| Potatoes and starches (g) | 1.1 ± 4.9 | 1.7 ± 3.6 | 16.9 ± 29.4 | 6.2 ± 14.1 | 0.6 ± 3.0 | 2.5 ± 8.0 | 0.7 ± 3.3 | 1.0 ± 2.2 | 16.0 ± 27.8 | 5.0 ± 11.5 | 0.3 ± 1.7 | 3.1 ± 13.0 |
| Sugars and sweeteners (g) | 1.1 ± 1.6 | 1.8 ± 2.5 | 1.2 ± 2.0 | 1.1 ± 1.3 | 0.3 ± 0.8 | 2.8 ± 3.1 | 0.6 ± 0.9 | 1.0 ± 1.5 | 1.5 ± 2.5 | 0.9 ± 1.1 | 0.2 ± 0.5 | 1.3 ± 1.6 |
| Vegetables (g) | 1.7 ± 3.4 | 2.5 ± 4.5 | 59.0 ± 35.7 | 35.7 ± 19.9 | 20.2 ± 15.4 | 19.0 ± 23.2 | 1.1 ± 2.1 | 1.7 ± 3.5 | 91.6 ± 78.2 | 31.1 ± 21.6 | 15.0 ± 12.4 | 17.0 ± 26.2 |
| Mushrooms, seaweed, nuts, and seeds (g) | 0.4 ± 1.5 | 0.6 ± 2.7 | 5.0 ± 17.4 | 2.2 ± 6.9 | 1.8 ± 5.1 | 0.6 ± 2.9 | 0.3 ± 1.0 | 0.5 ± 2.7 | 6.3 ± 22.3 | 2.1 ± 7.3 | 1.4 ± 3.8 | 0.2 ± 0.9 |
| Legumes (g) | 1.0 ± 3.1 | 17.4 ± 28.4 | 0.3 ± 3.3 | 3.0 ± 10.1 | 0.4 ± 3.5 | 2.5 ± 9.8 | 0.6 ± 2.0 | 15.8 ± 29.5 | 0.3 ± 2.2 | 3.6 ± 13.6 | 0.2 ± 1.7 | 1.2 ± 4.4 |
| Fish and shellfish (g) | 2.6 ± 5.5 | 12.4 ± 29.0 | 1.0 ± 4.0 | 5.5 ± 15.4 | 2.1 ± 4.9 | 6.1 ± 18.2 | 1.7 ± 3.6 | 6.9 ± 16.6 | 1.0 ± 4.2 | 4.8 ± 13.5 | 1.5 ± 3.6 | 3.5 ± 10.9 |
| Meat (g) | 0.9 ± 2.9 | 47.6 ± 48.6 | 2.7 ± 6.2 | 23.5 ± 21.7 | 10.4 ± 11.2 | 10.8 ± 22.6 | 0.6 ± 1.9 | 21.2 ± 21.6 | 3.4 ± 7.8 | 16.9 ± 13.9 | 6.8 ± 6.3 | 5.6 ± 11.6 |
| Eggs (g) | 0.6 ± 2.7 | 8.4 ± 19.7 | 0.7 ± 3.5 | 5.9 ± 12.0 | 5.5 ± 8.6 | 3.7 ± 10.0 | 0.4 ± 1.6 | 6.3 ± 16.3 | 1.0 ± 4.5 | 5.2 ± 10.9 | 3.6 ± 5.4 | 2.1 ± 6.1 |
| Milk and dairy products (g) | 0.7 ± 2.4 | 0.4 ± 1.8 | 0.4 ± 2.0 | 1.8 ± 7.2 | 5.3 ± 10.6 | 15.0 ± 17.3 | 0.4 ± 1.4 | 0.3 ± 1.4 | 0.3 ± 1.5 | 1.4 ± 5.4 | 3.5 ± 7.3 | 11.8 ± 19.7 |
| Fats and oils (g) | 1.2 ± 1.7 | 2.8 ± 3.3 | 2.5 ± 3.3 | 2.6 ± 2.0 | 2.3 ± 2.8 | 3.5 ± 2.9 | 0.6 ± 1.0 | 1.3 ± 1.5 | 2.8 ± 2.7 | 2.0 ± 1.4 | 1.4 ± 1.3 | 1.9 ± 1.4 |
| Seasonings and spices (g) | 2.6 ± 3.4 | 11.2 ± 7.5 | 9.3 ± 10.0 | 11.3 ± 12.1 | 6.0 ± 6.8 | 9.2 ± 9.4 | 2.1 ± 3.3 | 7.0 ± 8.6 | 13.8 ± 27.3 | 13.6 ± 42.5 | 4.4 ± 6.1 | 5.6 ± 7.0 |
| Other foods (g) | 20.9 ± 19.7 | 4.2 ± 9.1 | 6.1 ± 14.3 | 7.8 ± 13.4 | 8.0 ± 12.8 | 6.5 ± 11.7 | 14.7 ± 25.8 | 3.9 ± 9.3 | 15.7 ± 52.2 | 9.4 ± 20.9 | 6.8 ± 12.4 | 6.1 ± 15.1 |
| Total dish weight(g) | - | - | - | - | - | - | 64.5 ± 38.2 | 62.1 ± 31.8 | 146.8 ± 89.7 | 90.4 ± 55.9 | 71.3 ± 19.7 | 66.5 ± 43.4 |

**Note:** Values are presented as mean ± standard deviation per 100 g or 100 kcal.
