# Supplementary material
Source: Research Square preprint supplement (doi:10.21203/rs.3.rs-9690482/v1)
Supplement: Supplementary file 2 [file 71fb36e13b5779d15a4fcb5a.docx]

**Supplementary Table 2. Nutrient density per 100 g and per 100 kcal by dish category among frequently prepared Japanese home-style dishes**

|  | Per 100 g | | | | | | Per 100 kcal | | | | | | | | | | | |
| --- | --- | --- | --- | --- | --- | --- | --- | --- | --- | --- | --- | --- | --- | --- | --- | --- | --- | --- |
| Nutrient | Staple dish  (*n* = 20) | Main dish  (*n* = 79) | Side dish  (*n* = 152) | Mixed dish  (*n* = 113) | Mixed dish  with staple  (*n* = 98) | Unclassifiable dish  (*n* = 56) | | Staple dish  (*n* = 20) | | Main dish  (*n* = 79) | | Side dish  (*n* = 152) | | Mixed dish  (*n* = 113) | | Mixed dish  with staple  (*n* = 98) | | Unclassifiable dish  (*n* = 56) | |
| Energy (kcal) | 177 ± 46 | 197 ± 82 | 88 ± 42 | 130 ± 44 | 152 ± 47 | 188 ± 73 | - | | - | | - | | - | | - | | - | |
| Protein (g) | 5.3 ± 1.9 | 13.9 ± 6.5 | 2.6 ± 1.7 | 7.7 ± 3.4 | 5.6 ± 2.2 | 7.3 ± 4.0 | 3.0 ± 0.9 | | 7.4 ± 2.9 | | 3.3 ± 2.2 | | 6.0 ± 2.0 | | 3.7 ± 1.0 | | 4.0 ± 2.2 | |
| Total fat (g) | 2.6 ± 1.9 | 13.4 ± 8.3 | 4.7 ± 3.5 | 8.1 ± 3.8 | 6.5 ± 4.1 | 9.3 ± 5.7 | 1.5 ± 1.1 | | 6.5 ± 1.6 | | 5.1 ± 2.4 | | 6.1 ± 1.7 | | 4.1 ± 1.4 | | 4.9 ± 2.1 | |
| Saturated fatty acids (g) | 0.9 ± 0.9 | 3.4 ± 3.0 | 1.0 ± 1.4 | 2.0 ± 1.3 | 1.8 ± 1.4 | 2.6 ± 1.5 | 0.5 ± 0.5 | | 1.6 ± 0.8 | | 1.0 ± 0.8 | | 1.5 ± 0.7 | | 1.1 ± 0.6 | | 1.5 ± 0.8 | |
| Monounsaturated fatty acids (g) | 0.8 ± 0.8 | 5.4 ± 3.9 | 1.8 ± 1.4 | 3.2 ± 1.6 | 2.5 ± 1.6 | 3.3 ± 2.7 | 0.4 ± 0.4 | | 2.5 ± 0.9 | | 1.9 ± 1.2 | | 2.3 ± 0.7 | | 1.5 ± 0.6 | | 1.8 ± 1.2 | |
| Polyunsaturated fatty acids (g) | 0.6 ± 0.4 | 3.1 ± 1.7 | 1.5 ± 1.3 | 2.0 ± 1.2 | 1.4 ± 1.3 | 2.2 ± 2.3 | 0.4 ± 0.3 | | 1.7 ± 0.7 | | 1.6 ± 1.1 | | 1.5 ± 0.8 | | 0.8 ± 0.6 | | 1.1 ± 0.8 | |
| Carbohydrate (g) | 34.4 ± 10.7 | 6.5 ± 4.1 | 10.0 ± 6.8 | 7.3 ± 4.5 | 19.0 ± 5.3 | 20.2 ± 15.2 | 19.3 ± 2.6 | | 3.7 ± 2.6 | | 11.7 ± 5.5 | | 5.9 ± 3.0 | | 13.1 ± 3.3 | | 10.6 ± 5.8 | |
| Sugars (g) | 2.2 ± 2.6 | 2.9 ± 2.4 | 3.4 ± 3.1 | 2.9 ± 2.0 | 2.0 ± 1.6 | 5.4 ± 4.0 | 1.2 ± 1.2 | | 1.6 ± 1.5 | | 4.4 ± 3.6 | | 2.4 ± 1.7 | | 1.4 ± 0.9 | | 3.1 ± 2.4 | |
| Total dietary fiber (g) | 1.6 ± 0.5 | 0.6 ± 1.1 | 2.2 ± 1.4 | 1.1 ± 0.6 | 1.3 ± 0.6 | 1.6 ± 1.2 | 0.9 ± 0.2 | | 0.4 ± 0.8 | | 2.8 ± 2.0 | | 1.0 ± 0.7 | | 0.9 ± 0.5 | | 1.0 ± 0.8 | |
| Salt equivalent (g) | 1.0 ± 0.5 | 1.1 ± 0.6 | 0.9 ± 0.5 | 1.0 ± 0.4 | 0.9 ± 0.4 | 1.1 ± 0.6 | 0.7 ± 0.6 | | 0.6 ± 0.3 | | 1.2 ± 0.9 | | 0.9 ± 0.6 | | 0.6 ± 0.3 | | 0.7 ± 0.5 | |
| Sodium (mg) | 398 ± 187 | 441 ± 221 | 343 ± 192 | 392 ± 142 | 352 ± 153 | 426 ± 251 | 262 ± 228 | | 251 ± 135 | | 477 ± 364 | | 344 ± 232 | | 249 ± 128 | | 264 ± 201 | |
| Potassium (mg) | 78 ± 32 | 225 ± 105 | 214 ± 92 | 198 ± 69 | 116 ± 44 | 194 ± 83 | 44 ± 16 | | 128 ± 62 | | 279 ± 147 | | 166 ± 71 | | 80 ± 31 | | 127 ± 84 | |
| Calcium (mg) | 18 ± 14 | 39 ± 45 | 35 ± 37 | 30 ± 30 | 32 ± 37 | 49 ± 43 | 10 ± 6 | | 29 ± 37 | | 48 ± 53 | | 26 ± 24 | | 20 ± 19 | | 34 ± 39 | |
| Magnesium (mg) | 13 ± 6 | 27 ± 11 | 19 ± 12 | 19 ± 9 | 13 ± 4 | 20 ± 9 | 8 ± 3 | | 17 ± 11 | | 24 ± 15 | | 16 ± 10 | | 9 ± 4 | | 12 ± 6 | |
| Phosphorus (mg) | 58 ± 24 | 140 ± 54 | 51 ± 27 | 90 ± 41 | 74 ± 44 | 99 ± 50 | 33 ± 13 | | 80 ± 34 | | 65 ± 36 | | 72 ± 29 | | 48 ± 19 | | 59 ± 38 | |
| Iron (mg) | 0.5 ± 0.2 | 0.9 ± 0.4 | 0.6 ± 0.4 | 0.7 ± 0.4 | 0.5 ± 0.2 | 0.6 ± 0.3 | 0.3 ± 0.1 | | 0.6 ± 0.4 | | 0.7 ± 0.6 | | 0.6 ± 0.4 | | 0.4 ± 0.1 | | 0.4 ± 0.2 | |
| Zinc (mg) | 0.5 ± 0.2 | 1.1 ± 0.6 | 0.4 ± 0.3 | 0.8 ± 0.4 | 0.7 ± 0.4 | 0.7 ± 0.4 | 0.3 ± 0.1 | | 0.6 ± 0.3 | | 0.5 ± 0.3 | | 0.6 ± 0.2 | | 0.5 ± 0.2 | | 0.4 ± 0.3 | |
| Copper (mg) | 0.08 ± 0.03 | 0.08 ± 0.05 | 0.07 ± 0.05 | 0.06 ± 0.04 | 0.07 ± 0.02 | 0.08 ± 0.06 | 0.05 ± 0.02 | | 0.05 ± 0.05 | | 0.09 ± 0.06 | | 0.05 ± 0.04 | | 0.05 ± 0.02 | | 0.05 ± 0.03 | |
| Vitamin A (μg RAE) | 10 ± 15 | 28 ± 32 | 51 ± 90 | 91 ± 493 | 32 ± 26 | 55 ± 73 | 6 ± 9 | | 18 ± 26 | | 67 ± 116 | | 79 ± 426 | | 22 ± 17 | | 38 ± 61 | |
| Vitamin D (μg) | 0.3 ± 1.0 | 1.1 ± 3.3 | 0.1 ± 0.4 | 1.0 ± 3.3 | 0.2 ± 0.3 | 0.4 ± 1.0 | 0.2 ± 0.7 | | 0.6 ± 2.0 | | 0.2 ± 0.4 | | 0.8 ± 2.6 | | 0.2 ± 0.2 | | 0.2 ± 0.4 | |
| Vitamin E (α-tocopherol, mg) | 0.3 ± 0.3 | 1.0 ± 0.7 | 0.8 ± 0.8 | 0.8 ± 0.6 | 0.6 ± 0.5 | 1.0 ± 0.8 | 0.2 ± 0.2 | | 0.5 ± 0.4 | | 1.0 ± 1.3 | | 0.6 ± 0.5 | | 0.4 ± 0.2 | | 0.6 ± 0.5 | |
| Vitamin K (μg) | 6 ± 22 | 21 ± 20 | 31 ± 53 | 26 ± 39 | 13 ± 14 | 17 ± 19 | 4 ± 13 | | 12 ± 14 | | 49 ± 106 | | 22 ± 34 | | 9 ± 9 | | 12 ± 20 | |
| Vitamin B1 (mg) | 0.08 ± 0.05 | 0.13 ± 0.13 | 0.06 ± 0.04 | 0.13 ± 0.12 | 0.07 ± 0.05 | 0.09 ± 0.08 | 0.04 ± 0.02 | | 0.07 ± 0.06 | | 0.07 ± 0.05 | | 0.10 ± 0.08 | | 0.05 ± 0.03 | | 0.05 ± 0.04 | |
| Vitamin B2 (mg) | 0.05 ± 0.03 | 0.13 ± 0.07 | 0.05 ± 0.03 | 0.10 ± 0.07 | 0.07 ± 0.04 | 0.10 ± 0.05 | 0.03 ± 0.02 | | 0.07 ± 0.05 | | 0.06 ± 0.05 | | 0.08 ± 0.06 | | 0.05 ± 0.02 | | 0.06 ± 0.04 | |
| Niacin equivalents (mg NE) | 2.2 ± 2.1 | 6.6 ± 5.0 | 1.3 ± 1.0 | 3.6 ± 2.2 | 2.1 ± 1.1 | 3.0 ± 2.7 | 1.3 ± 1.3 | | 3.3 ± 2.3 | | 1.7 ± 1.2 | | 2.8 ± 1.3 | | 1.4 ± 0.5 | | 1.7 ± 1.4 | |
| Vitamin B6 (mg) | 0.05 ± 0.02 | 0.19 ± 0.13 | 0.10 ± 0.05 | 0.14 ± 0.08 | 0.07 ± 0.03 | 0.12 ± 0.09 | 0.03 ± 0.01 | | 0.10 ± 0.06 | | 0.12 ± 0.07 | | 0.11 ± 0.05 | | 0.05 ± 0.02 | | 0.07 ± 0.05 | |
| Vitamin B12 (μg) | 0.3 ± 0.7 | 0.9 ± 2.1 | 0.1 ± 0.2 | 0.5 ± 1.6 | 0.3 ± 0.7 | 0.7 ± 1.8 | 0.2 ± 0.5 | | 0.5 ± 1.2 | | 0.1 ± 0.2 | | 0.5 ± 1.4 | | 0.2 ± 0.4 | | 0.4 ± 0.9 | |
| Folate (μg) | 18 ± 13 | 15 ± 9 | 33 ± 30 | 26 ± 48 | 14 ± 8 | 27 ± 16 | 10 ± 6 | | 10 ± 8 | | 47 ± 55 | | 23 ± 42 | | 10 ± 5 | | 17 ± 14 | |
| Pantothenic acid (mg) | 0.40 ± 0.18 | 0.74 ± 0.51 | 0.31 ± 0.17 | 0.52 ± 0.40 | 0.37 ± 0.14 | 0.54 ± 0.26 | 0.23 ± 0.10 | | 0.40 ± 0.29 | | 0.40 ± 0.32 | | 0.41 ± 0.33 | | 0.25 ± 0.08 | | 0.32 ± 0.17 | |
| Biotin (μg) | 2.3 ± 1.2 | 5.0 ± 4.5 | 1.9 ± 1.8 | 4.3 ± 8.4 | 2.8 ± 2.2 | 3.7 ± 2.4 | 1.3 ± 0.6 | | 3.2 ± 3.9 | | 2.7 ± 3.3 | | 3.6 ± 7.3 | | 1.9 ± 1.3 | | 2.1 ± 1.5 | |
| Vitamin C (mg) | 2 ± 3 | 2 ± 5 | 12 ± 12 | 7 ± 8 | 4 ± 4 | 5 ± 6 | 1 ± 2 | | 1 ± 3 | | 18 ± 26 | | 6 ± 6 | | 2 ± 3 | | 4 ± 6 | |
| Total dish weight (g) | - | - | - | - | - | - | 64.5 ± 38.2 | | 62.1 ± 31.8 | | 146.8 ± 89.7 | | 90.4 ± 55.9 | | 71.3 ± 19.7 | | 66.5 ± 43.4 | |

**Note:** Values are presented as mean ± standard deviation per 100 g or 100 kcal. Nutrient values were calculated based on the *Standard Tables of Food Composition in Japan.*

Vitamin A is expressed as retinol activity equivalents (RAE), and vitamin E as α-tocopherol.

Sugars were calculated as the sum of seven saccharides (glucose, fructose, galactose, sucrose, maltose, lactose, and trehalose).
