# Supplementary material
Source: Research Square preprint supplement (doi:10.21203/rs.3.rs-9690482/v1)
Supplement: Supplementary file 3 [file d162ff36b9a0d1e5d9c41012.docx]

**Supplementary Table. 1 Definitions and classification criteria for dish categories based on the Nutrient Profile Model for Dishes in Japan (version 1.0)**

| Dish category | Primary classification criteria | Additional criteria (serving-based) | Representative examples |
| --- | --- | --- | --- |
| Staple dish | Staple ingredients (e.g., rice, bread, noodles, other grains) account for 2/3 of total dish weight. | Not applicable | Plain rice, bread, noodles |
| Main dish | Protein-rich ingredients (e.g., meat, seafood, soybean products, eggs) account for 2/3 of total dish weight. | Not applicable | Grilled fish, fried chicken, and tofu dishes |
| Side dish | Vegetables, potatoes, legumes (excluding soybeans), mushrooms, seaweed, and nuts and seeds account for 2/3 of the total dish weight. | Not applicable | Vegetable stir-fries, salads |
| Mixed dish | No single food group accounts for 2/3 of the total dish weight. | Staple component ≤ 0.5 serving;  both main-dish and side-dish components ≥ 0.5 serving each | Stir-fried pork and vegetables, pasta with vegetables |
| Mixed dish with staple | No single food group accounts for 2/3 of the total dish weight. | Staple component ≥ 0.5 serving;  at least one of the main-dish or side-dish components ≥ 0.5 serving | Rice bowls (donburi), curry rice |
| Unclassifiable | Does not meet criteria for any of the above categories | Not applicable | Dishes dominated by dairy products or fruits |

**Notes:** Serving size definitions were based on the Nutrient Profile Model for Dishes in Japan (version 1.0).

One serving of a staple component was defined as providing 40 g of carbohydrates from staple ingredients, one serving of a main-dish component as providing 6 g of protein from protein-rich ingredients, and one serving of a side-dish component as comprising 70 g of primary ingredients.

Ingredient weights were aggregated by food group for each recipe, and dish categories were assigned automatically based on the criteria shown in this table.
